# Supplementary material for: Engineering of carbon nanotube/polydimethylsiloxane nanocomposites with enhanced sensitivity for wearable motion sensors
Source: Royal Society of Chemistry journal article supplement (doi:10.1039/c7tc03434b), 2017-01-01
Supplement: c7tc03434b1.pdf [file c7tc03434b1.pdf]

Electronic Supplementary Information

**Engineering of Carbon Nanotube/Polydimethylsiloxane**

**Nanocomposites with Enhanced Sensitivity for Wearable Motion**

**Sensors**

*Qi Li<sup>a</sup>, Jin Li<sup>a</sup>, Danhquang Tran<sup>a</sup>, Chengqiang Luo<sup>a</sup>, Yang Gao<sup>a,\*</sup>, Cunjiang Yu<sup>b</sup>,*

*Fuzhen Xuan<sup>a,\*</sup>*

<sup>a</sup>School of Mechanical and Power Engineering, East China University of Science and  
Technology, Shanghai 200237 (China)

<sup>b</sup>Department of Mechanical Engineering, University of Houston, Houston, TX, 77204  
(USA)

\*E-mail: yanggao@ecust.edu.cn (Yang Gao); fzxuan@ecust.edu.cn (Fuzhen Xuan)

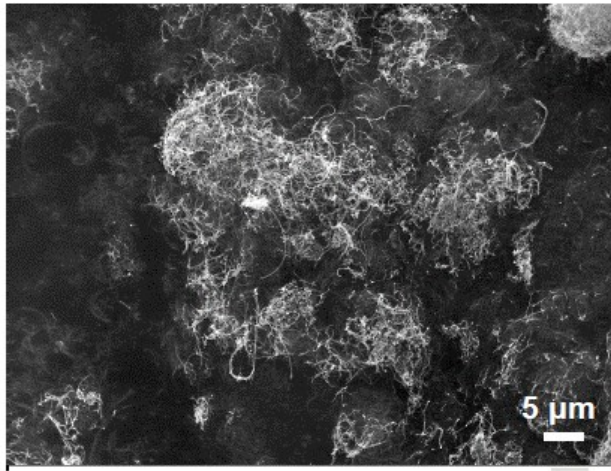

**Figure S1.** An SEM image of CNTs used to prepare the CNT/PDMS nanocomposites.

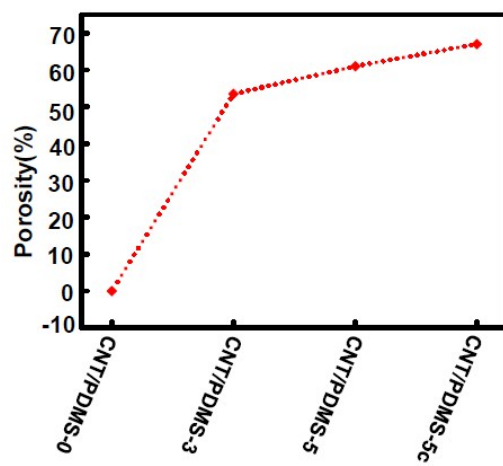

**Figure S2.** Porosity of the CNT/PDMS nanocomposites.

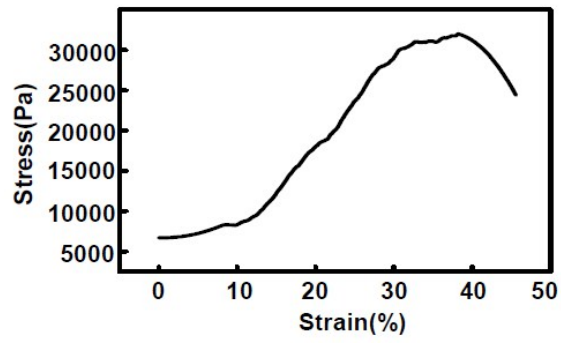

**Figure S3.** Stress-strain curve of the sample of CNT/PDMS-0.

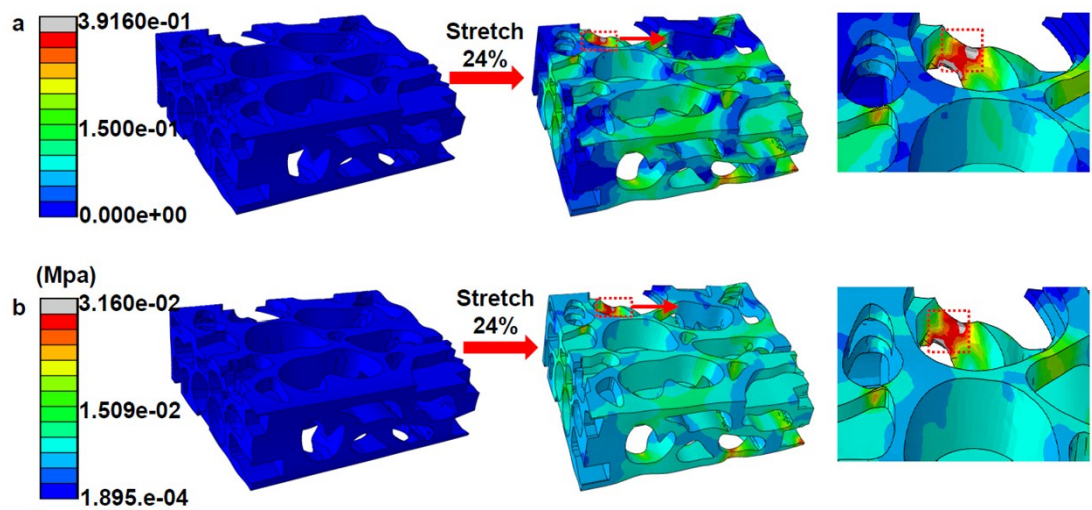

**Figure S4.** Finite-element simulation of the porous CNT/PDMS nanocomposite during stretching. (a) Strain and (b) stress distributions using nonlinear material condition.

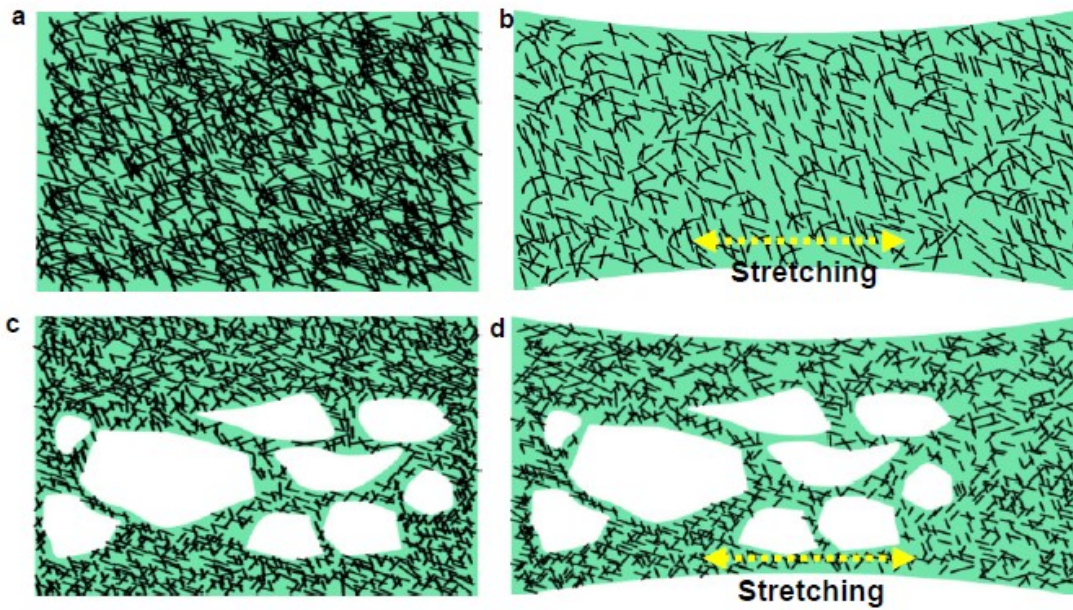

**Figure S5.** Schematics illustrating the stretching process of CNT/PDMS nanocomposites with (a and b) and without porous structures (c and d).
